# Supplementary material for: Migration of methylethynyl group in a long-lived carbocation
Source: Royal Society of Chemistry journal article supplement (doi:10.1039/c2ob27208c), 2013-01-01
Supplement: c2ob27208c.pdf [file c2ob27208c.pdf]

## Migration of methylethynyl group in a long-lived carbocation

George E. Salnikov, Alexander M. Genaev\*, Vladimir A. Bushmelev, and Vyacheslav G. Shubin

*Vorozhtsov Novosibirsk Institute of Organic Chemistry*

*Academician Lavrent'ev Ave., 9, Novosibirsk 630090, Russian Federation*

*e-mail: genaev@nioch.nsc.ru*

### Electronic Supplementary Information

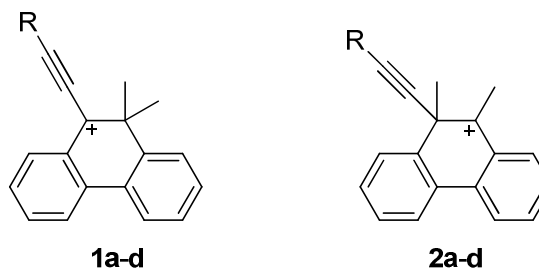

R = H (**a**), Me (**b**), Ph (**c**), CF<sub>3</sub> (**d**)

### Table of content

|                                                                 | page  |                                                                | page    |
|-----------------------------------------------------------------|-------|----------------------------------------------------------------|---------|
| <sup>1</sup> H NMR spectrum of cations <b>1d</b> and <b>2d</b>  | S2    | Equilibrium constant of <b>1d</b> ⇌ <b>2d</b>                  | S9      |
| <sup>13</sup> C NMR spectrum of cations <b>1d</b> and <b>2d</b> | S3    | Rate constant of the reaction <b>1d</b> → <b>2d</b> at 177.6 K | S10     |
| NOESY spectrum of cations <b>1d</b> and <b>2d</b>               | S4-S5 | Kinetics of the reaction <b>1d</b> → <b>2d</b>                 | S10     |
| <sup>1</sup> H NMR spectrum of cation <b>1b</b>                 | S6    | Kinetics of the reaction <b>1b</b> → <b>1b'</b>                | S11     |
| <sup>13</sup> C NMR spectrum of cation <b>1b</b>                | S7    | Quantum chemical calculations                                  | S12-S14 |
| NOESY spectrum of cation <b>1b</b>                              | S8    |                                                                |         |

<sup>1</sup>H NMR spectrum of cations **1d** and **2d** in FSO<sub>3</sub>H-SO<sub>2</sub>ClF-CD<sub>2</sub>Cl<sub>2</sub> at -50 °C

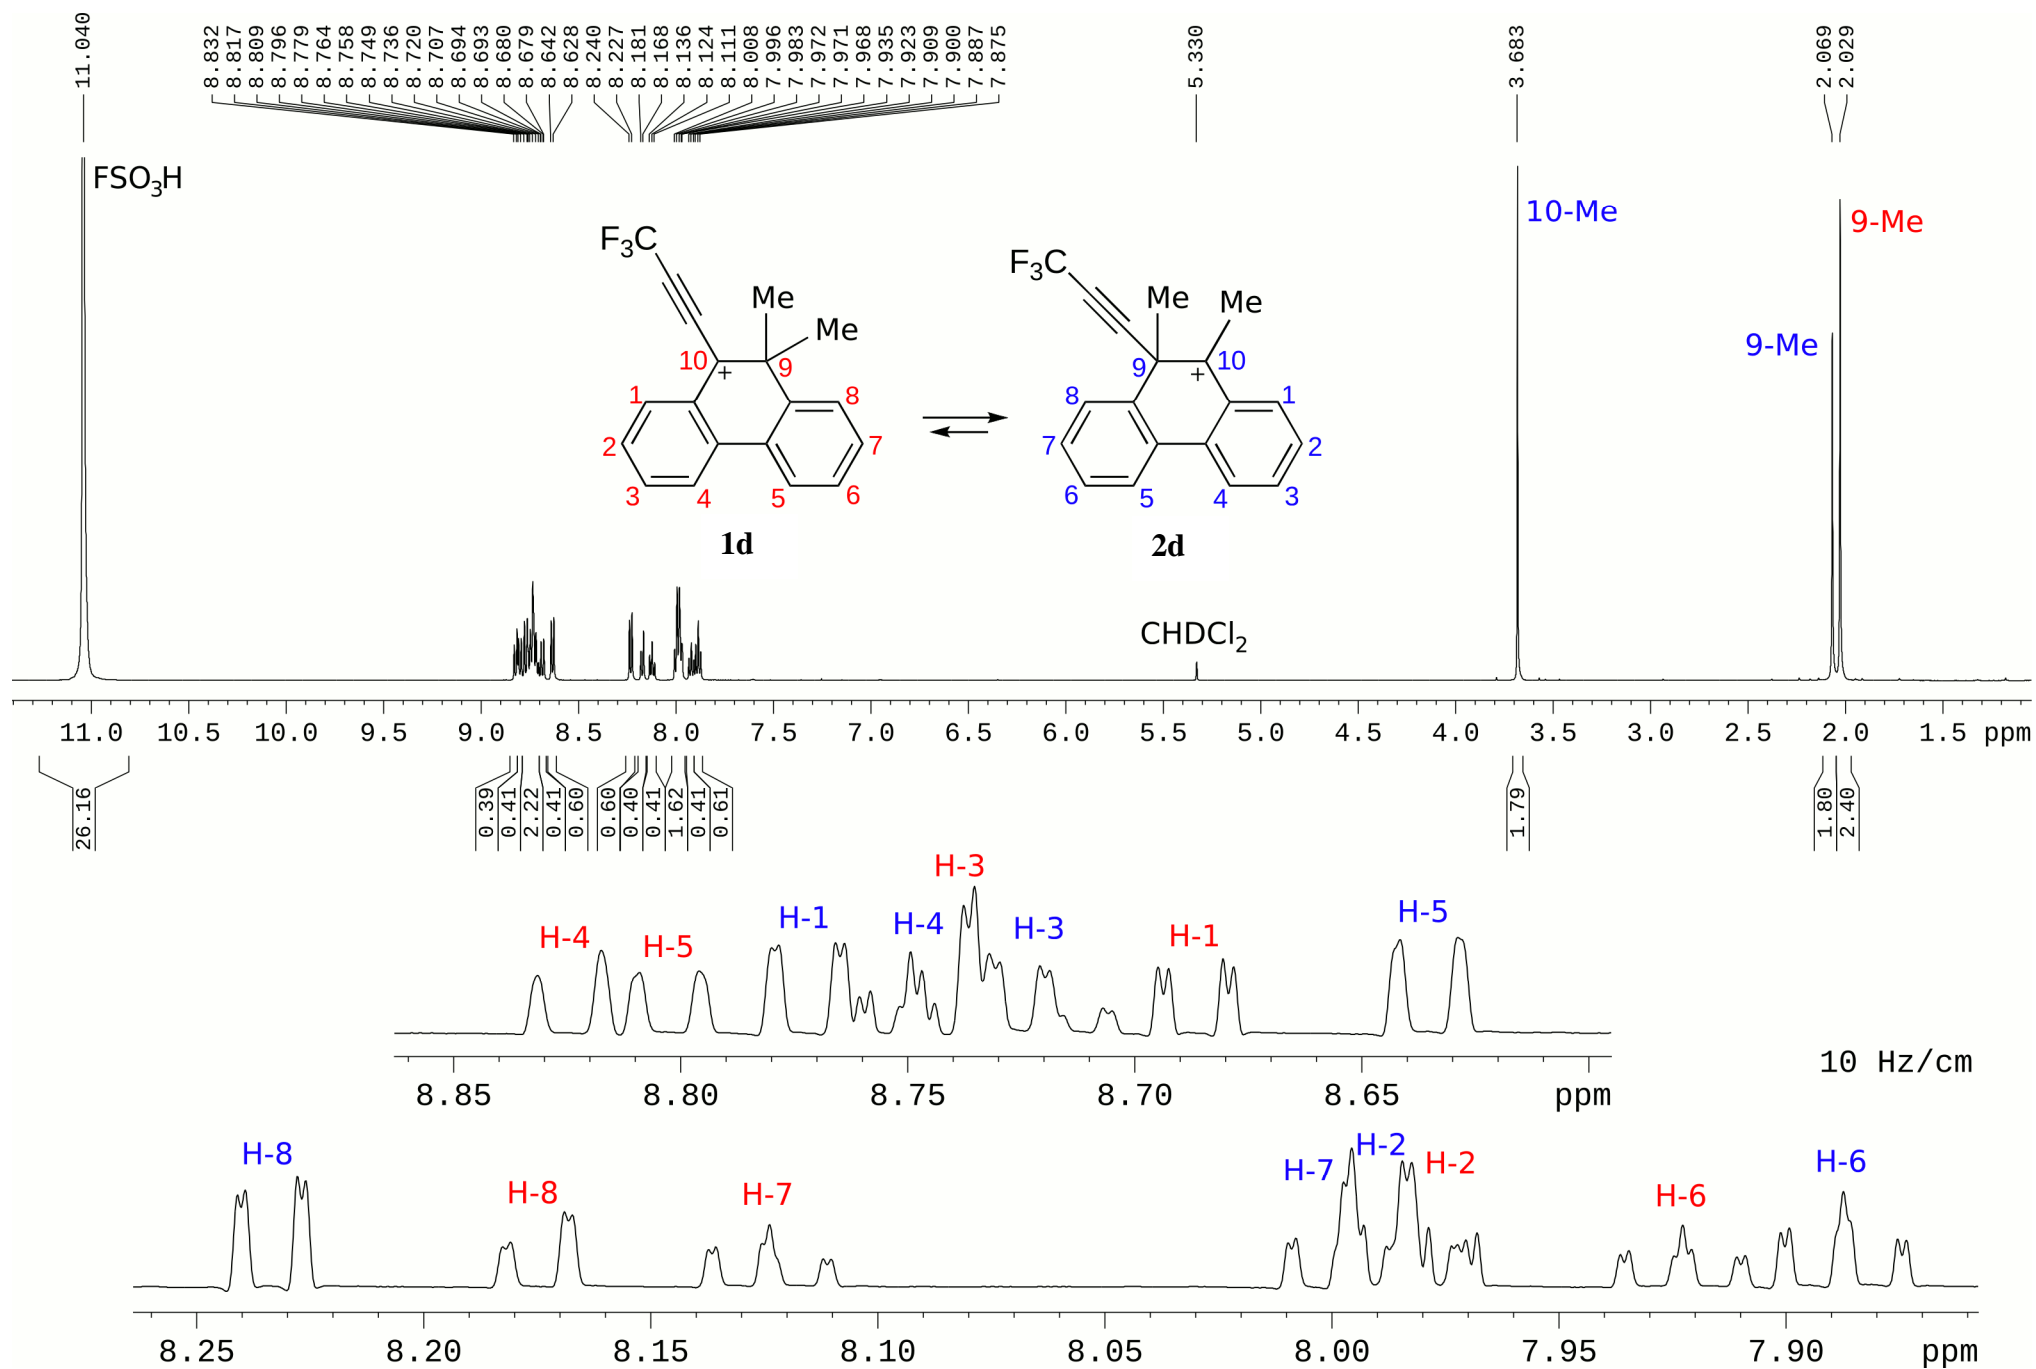

$^{13}\text{C}$  NMR spectrum of cations **1d** and **2d** in  $\text{FSO}_3\text{H-SO}_2\text{ClF-CD}_2\text{Cl}_2$  at  $-50^\circ\text{C}$

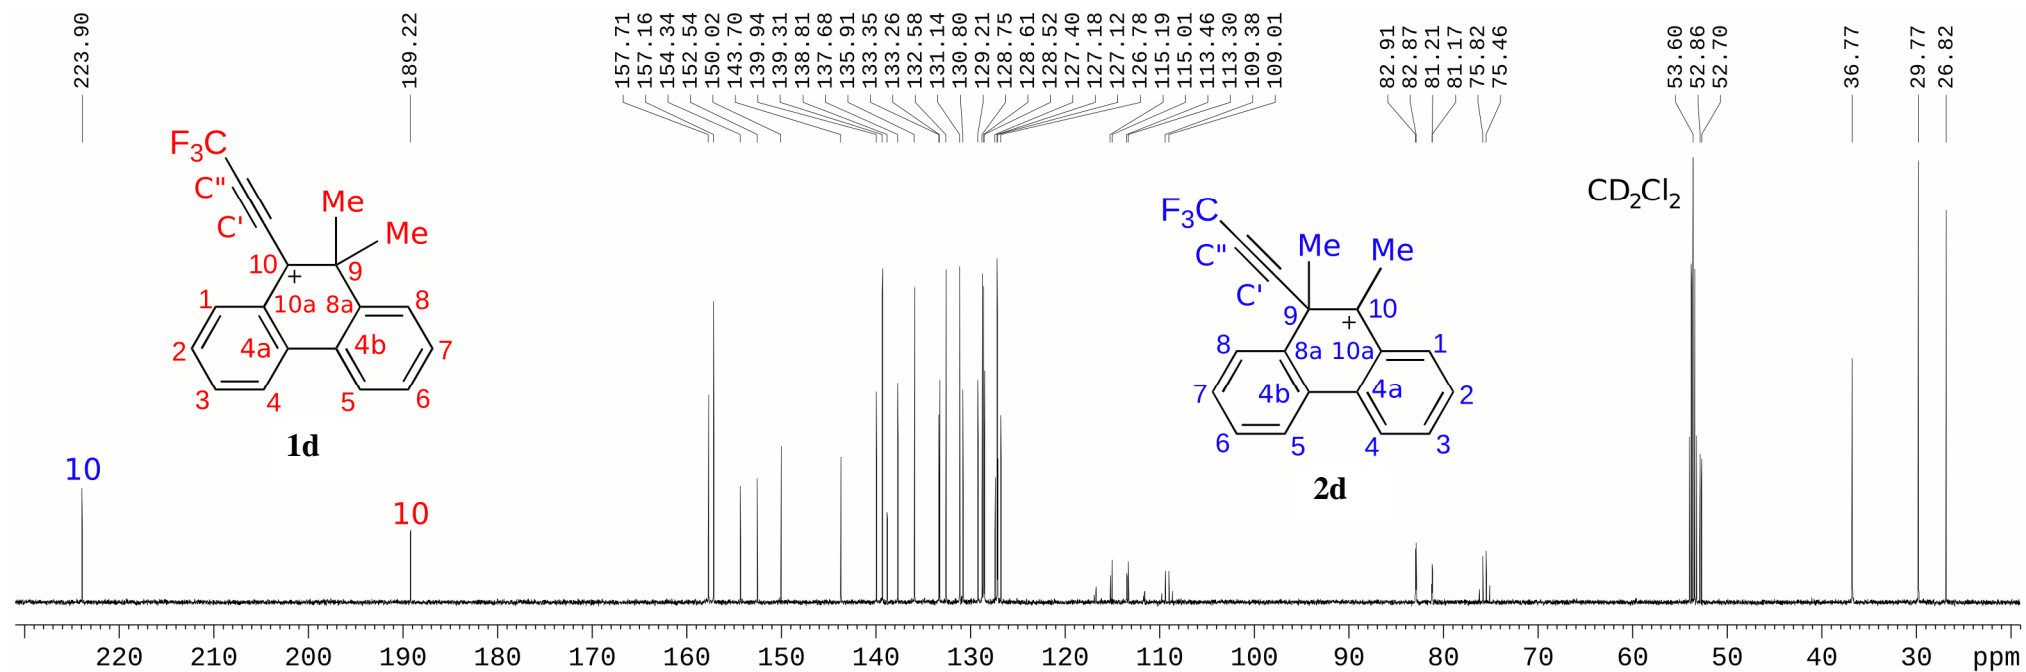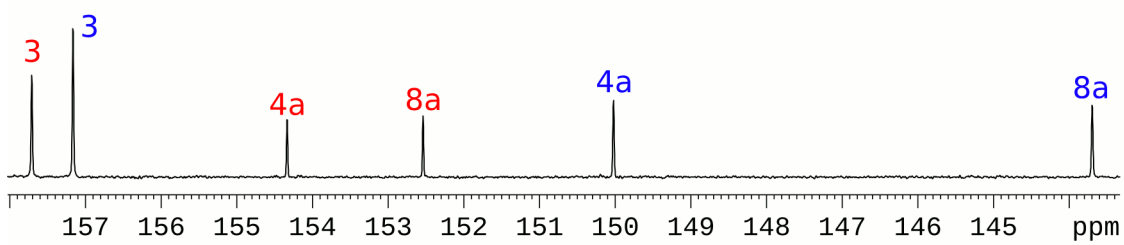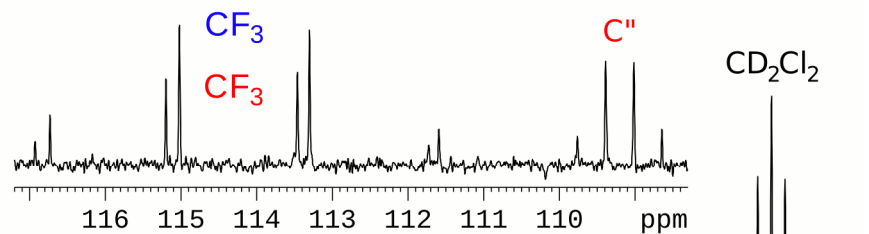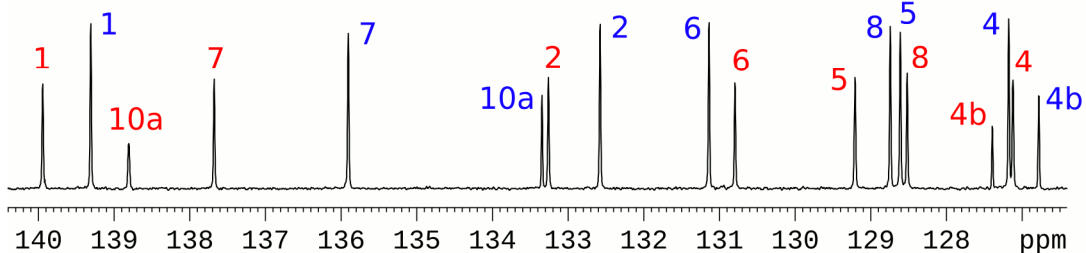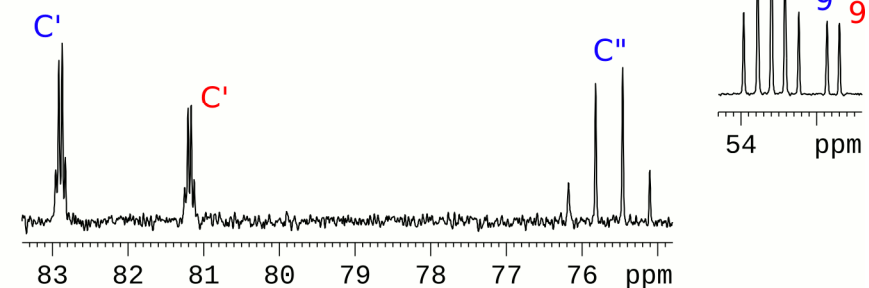

NOESY spectra (methyl region) of cations **1d** and **2d** in FSO<sub>3</sub>H-SO<sub>2</sub>ClF-CD<sub>2</sub>Cl<sub>2</sub>

Left: at -47 °C (mixing time 0.4 s)  
Right: at -22.5 °C (mixing time 0.5 s)

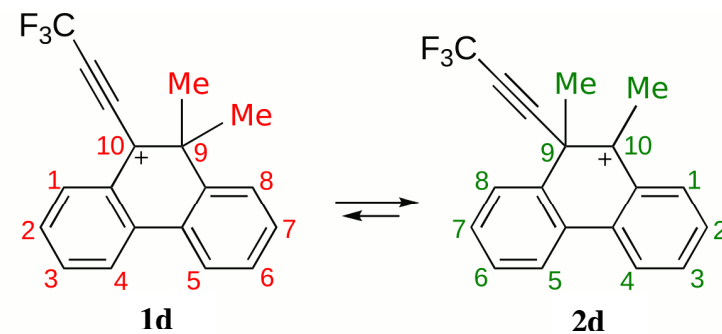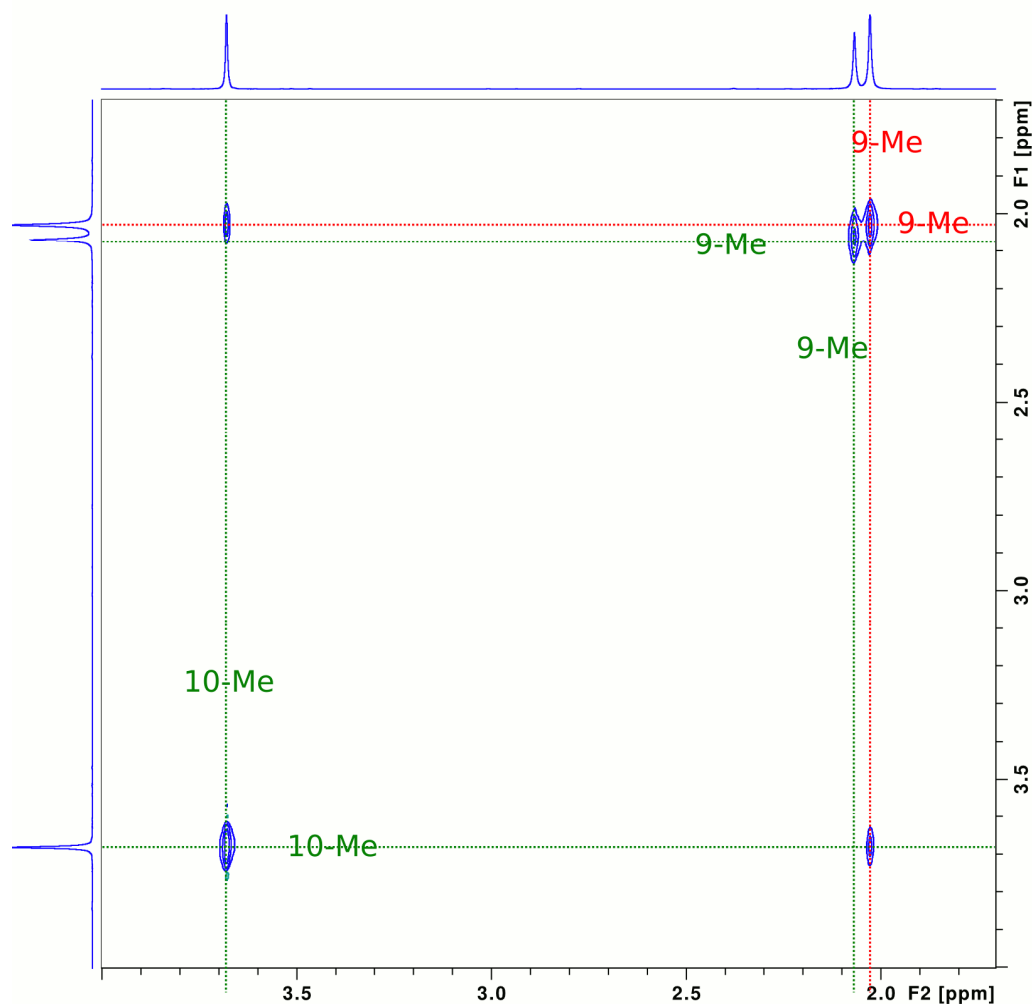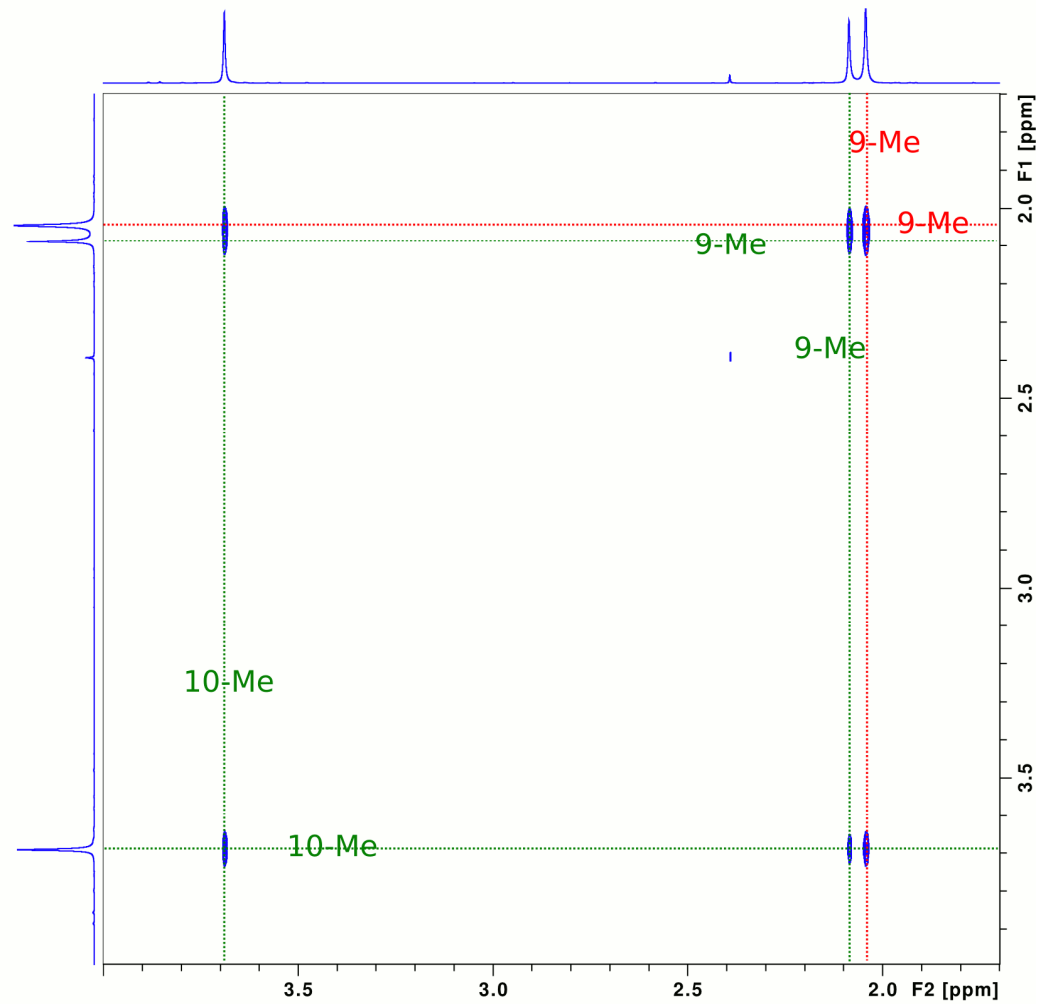

NOESY spectrum (aromatic region) of cations **1d** and **2d** in FSO<sub>3</sub>H-SO<sub>2</sub>ClF-CD<sub>2</sub>Cl<sub>2</sub> at -22.5 °C (mixing time 0.5 s)

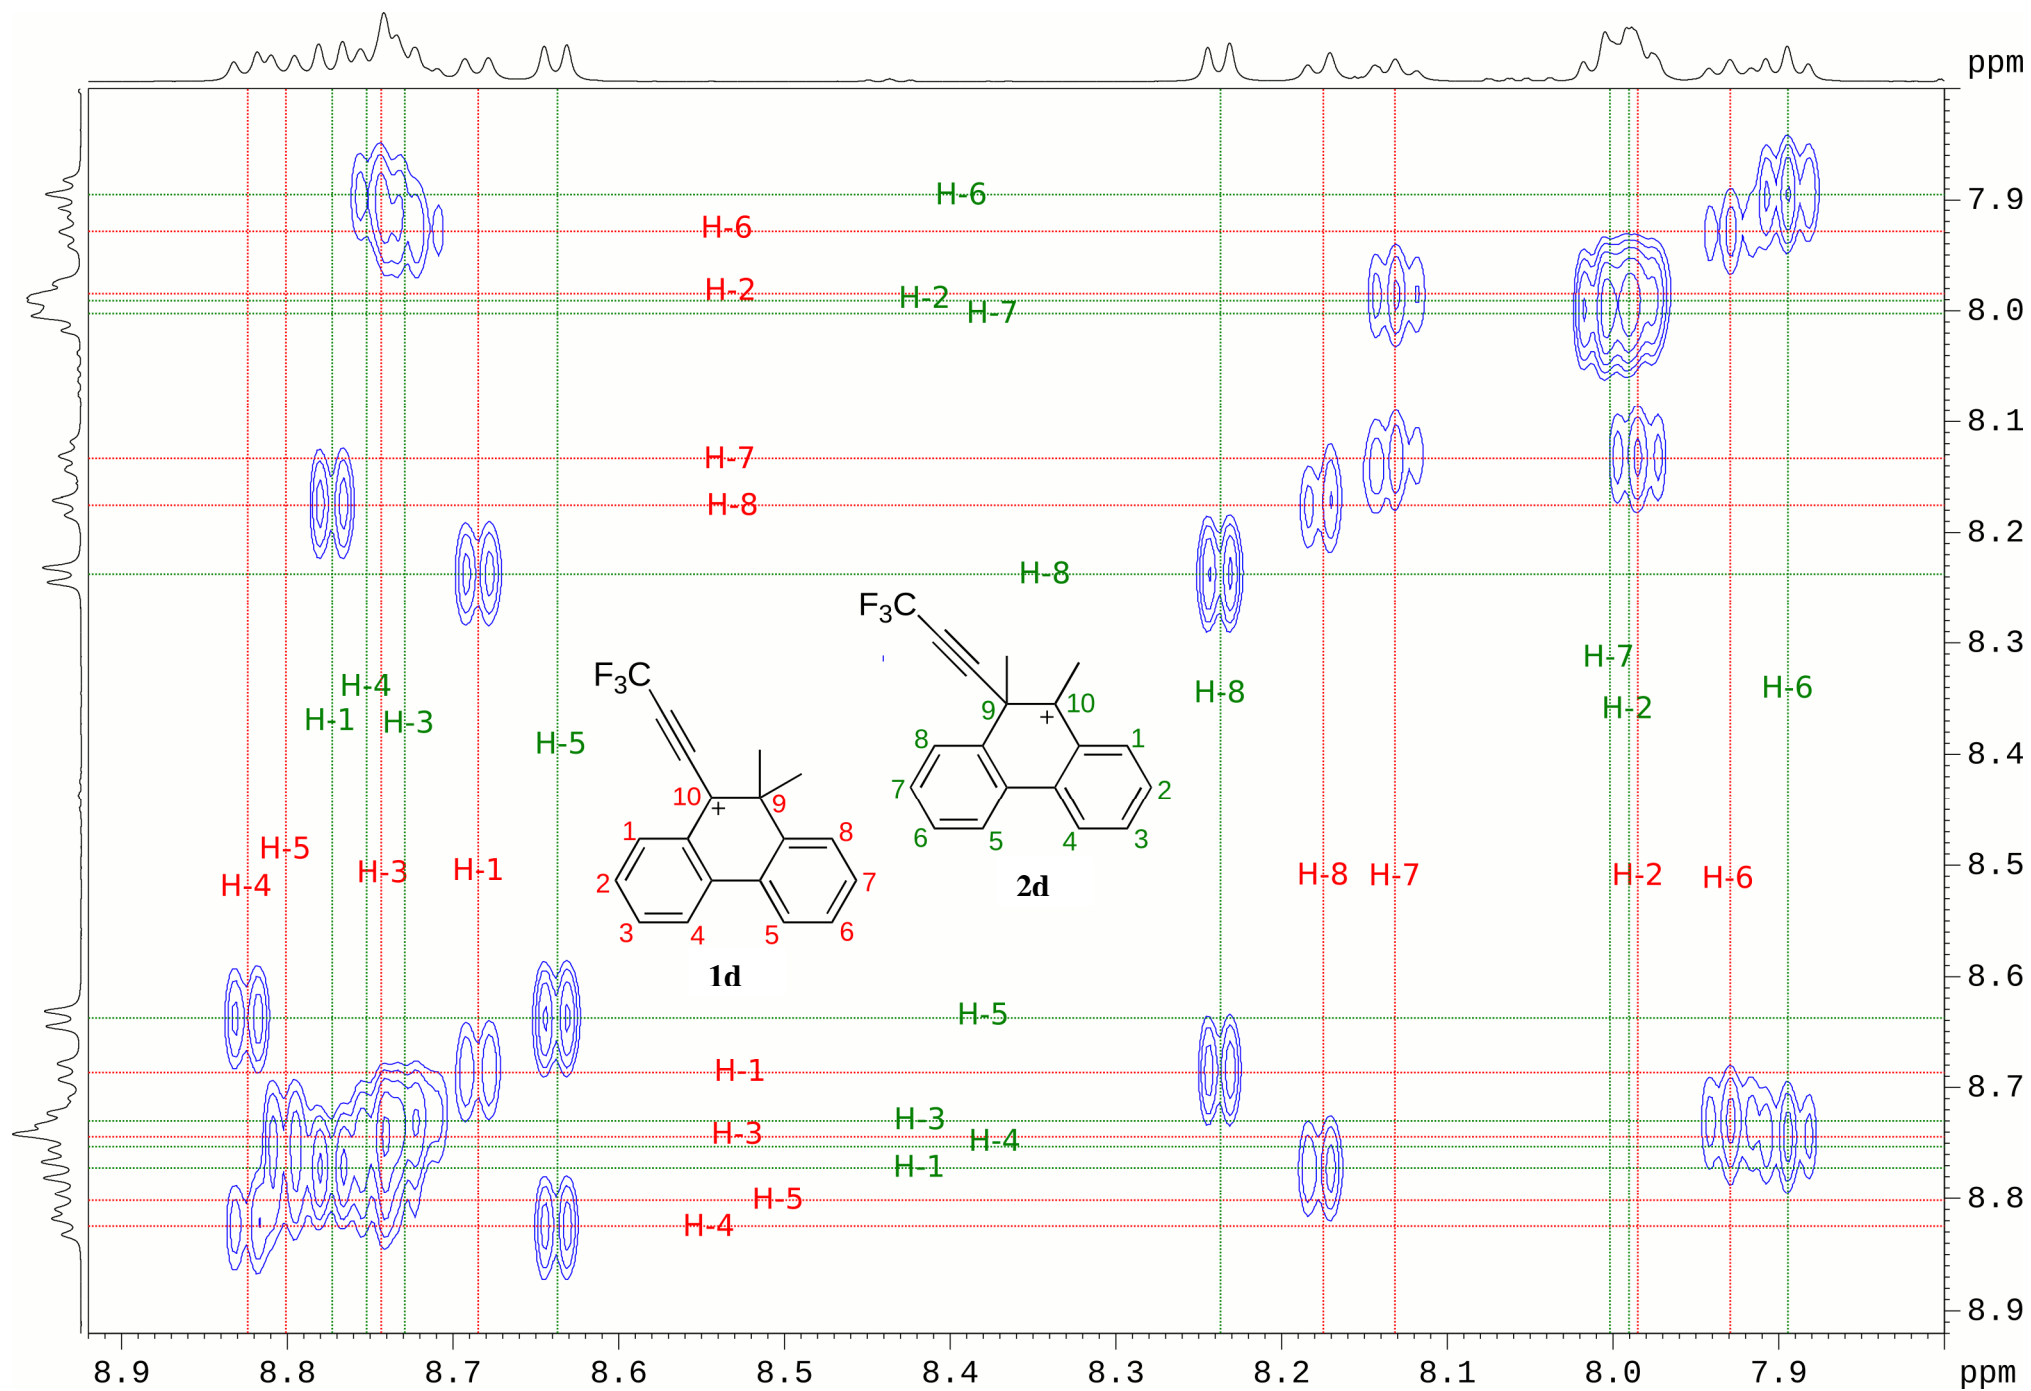

$^1\text{H}$  NMR spectrum of cation **1b** in  $\text{CF}_3\text{SO}_3\text{H}\text{-CD}_2\text{Cl}_2$  at  $30\text{ }^\circ\text{C}$ . Unpicked signals correspond to unidentified decomposition products.

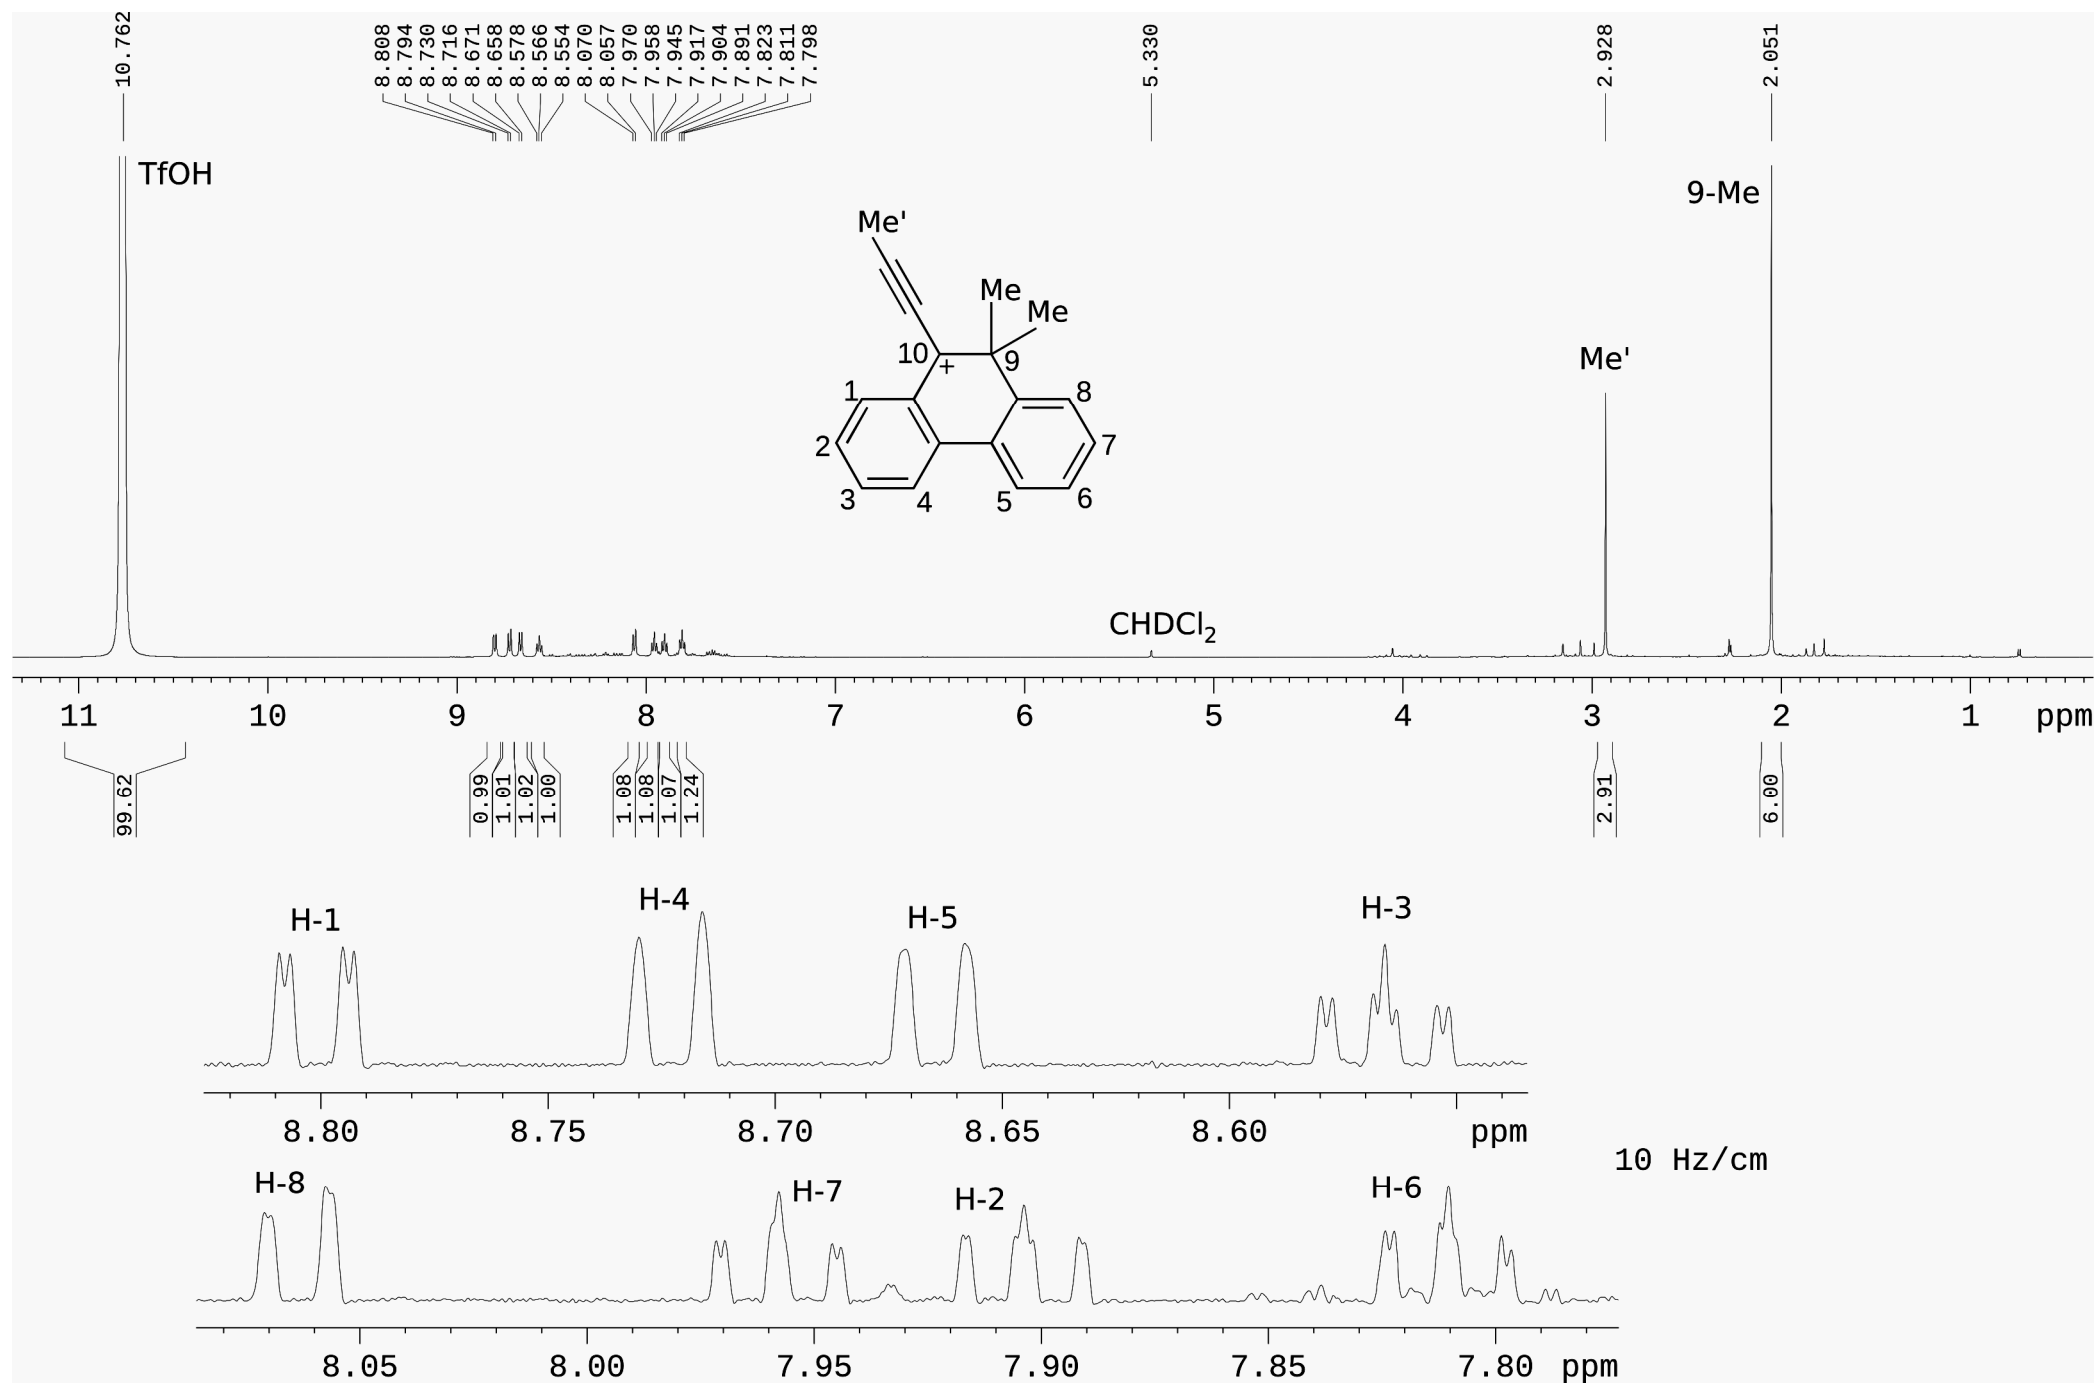

$^{13}\text{C}$  NMR spectrum of cation **1b** in  $\text{CF}_3\text{SO}_3\text{H}\text{-CD}_2\text{Cl}_2$  at 30 °C. Unpicked signals correspond to unidentified decomposition products.

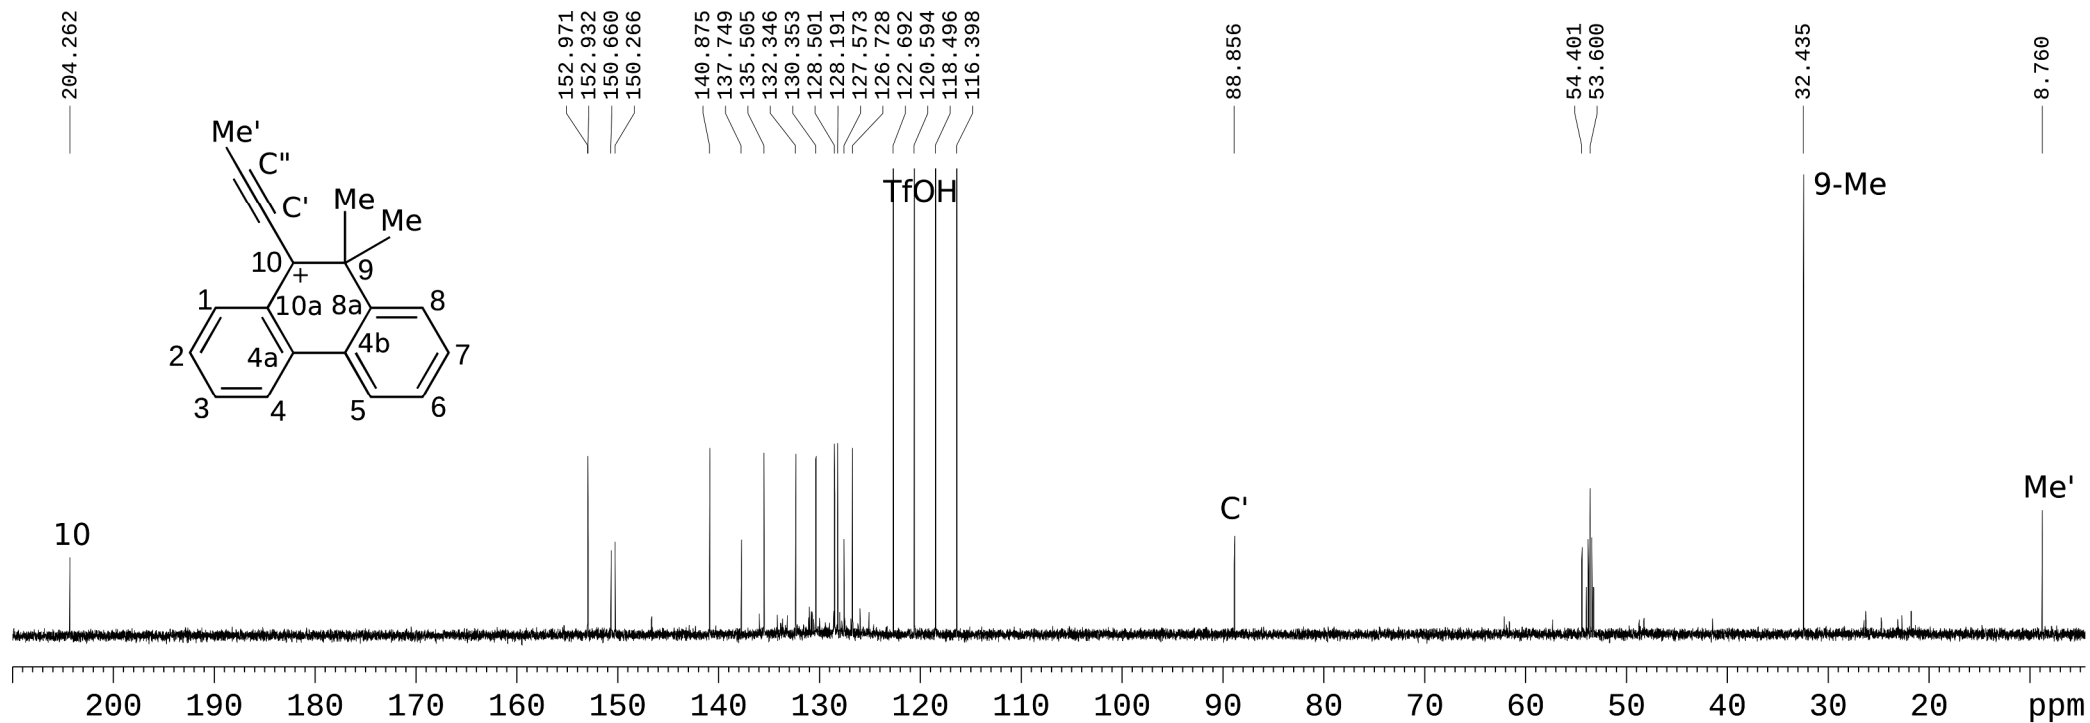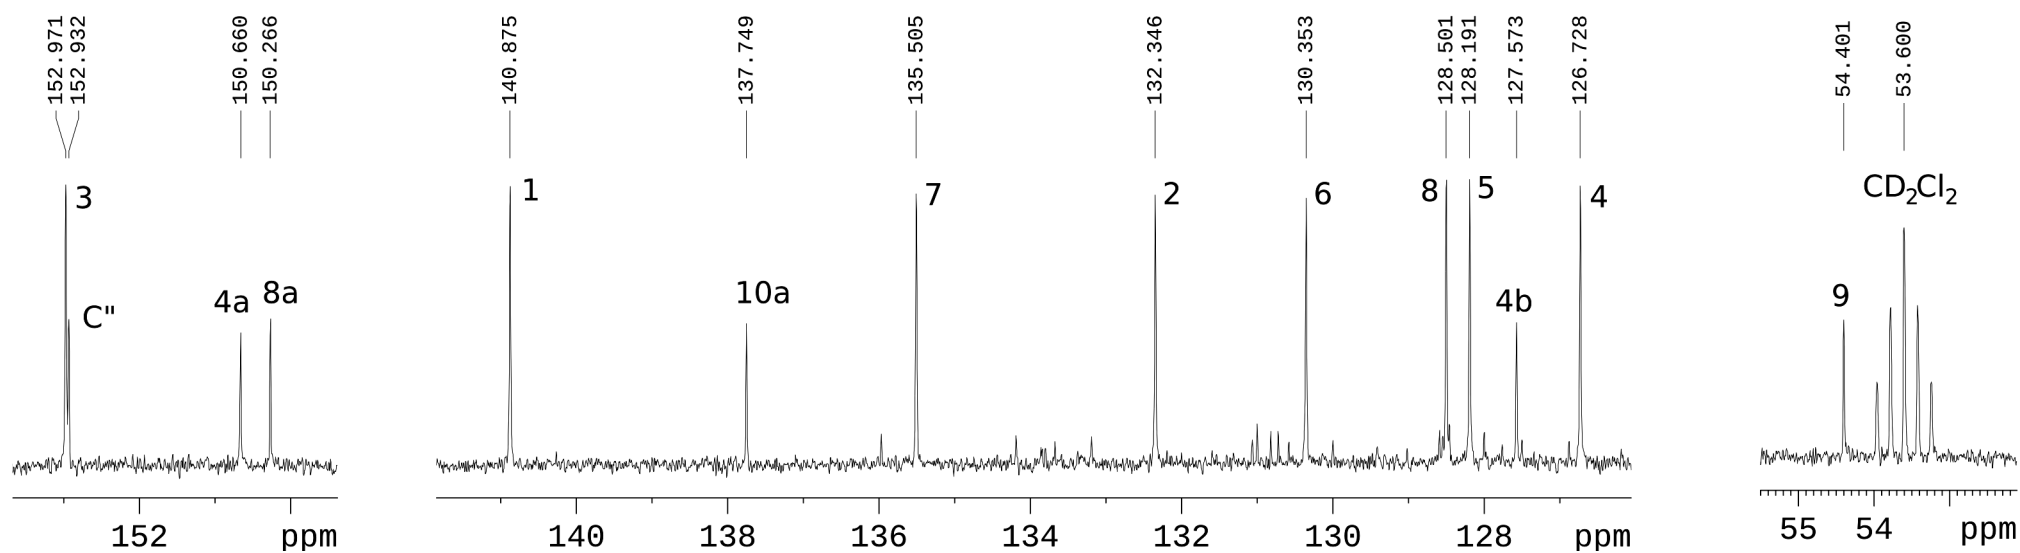

NOESY spectrum of cation **1b** in  $\text{CF}_3\text{SO}_3\text{H}-\text{CD}_2\text{Cl}_2$  at 28 °C (aromatic region; mixing time 0.7 s)

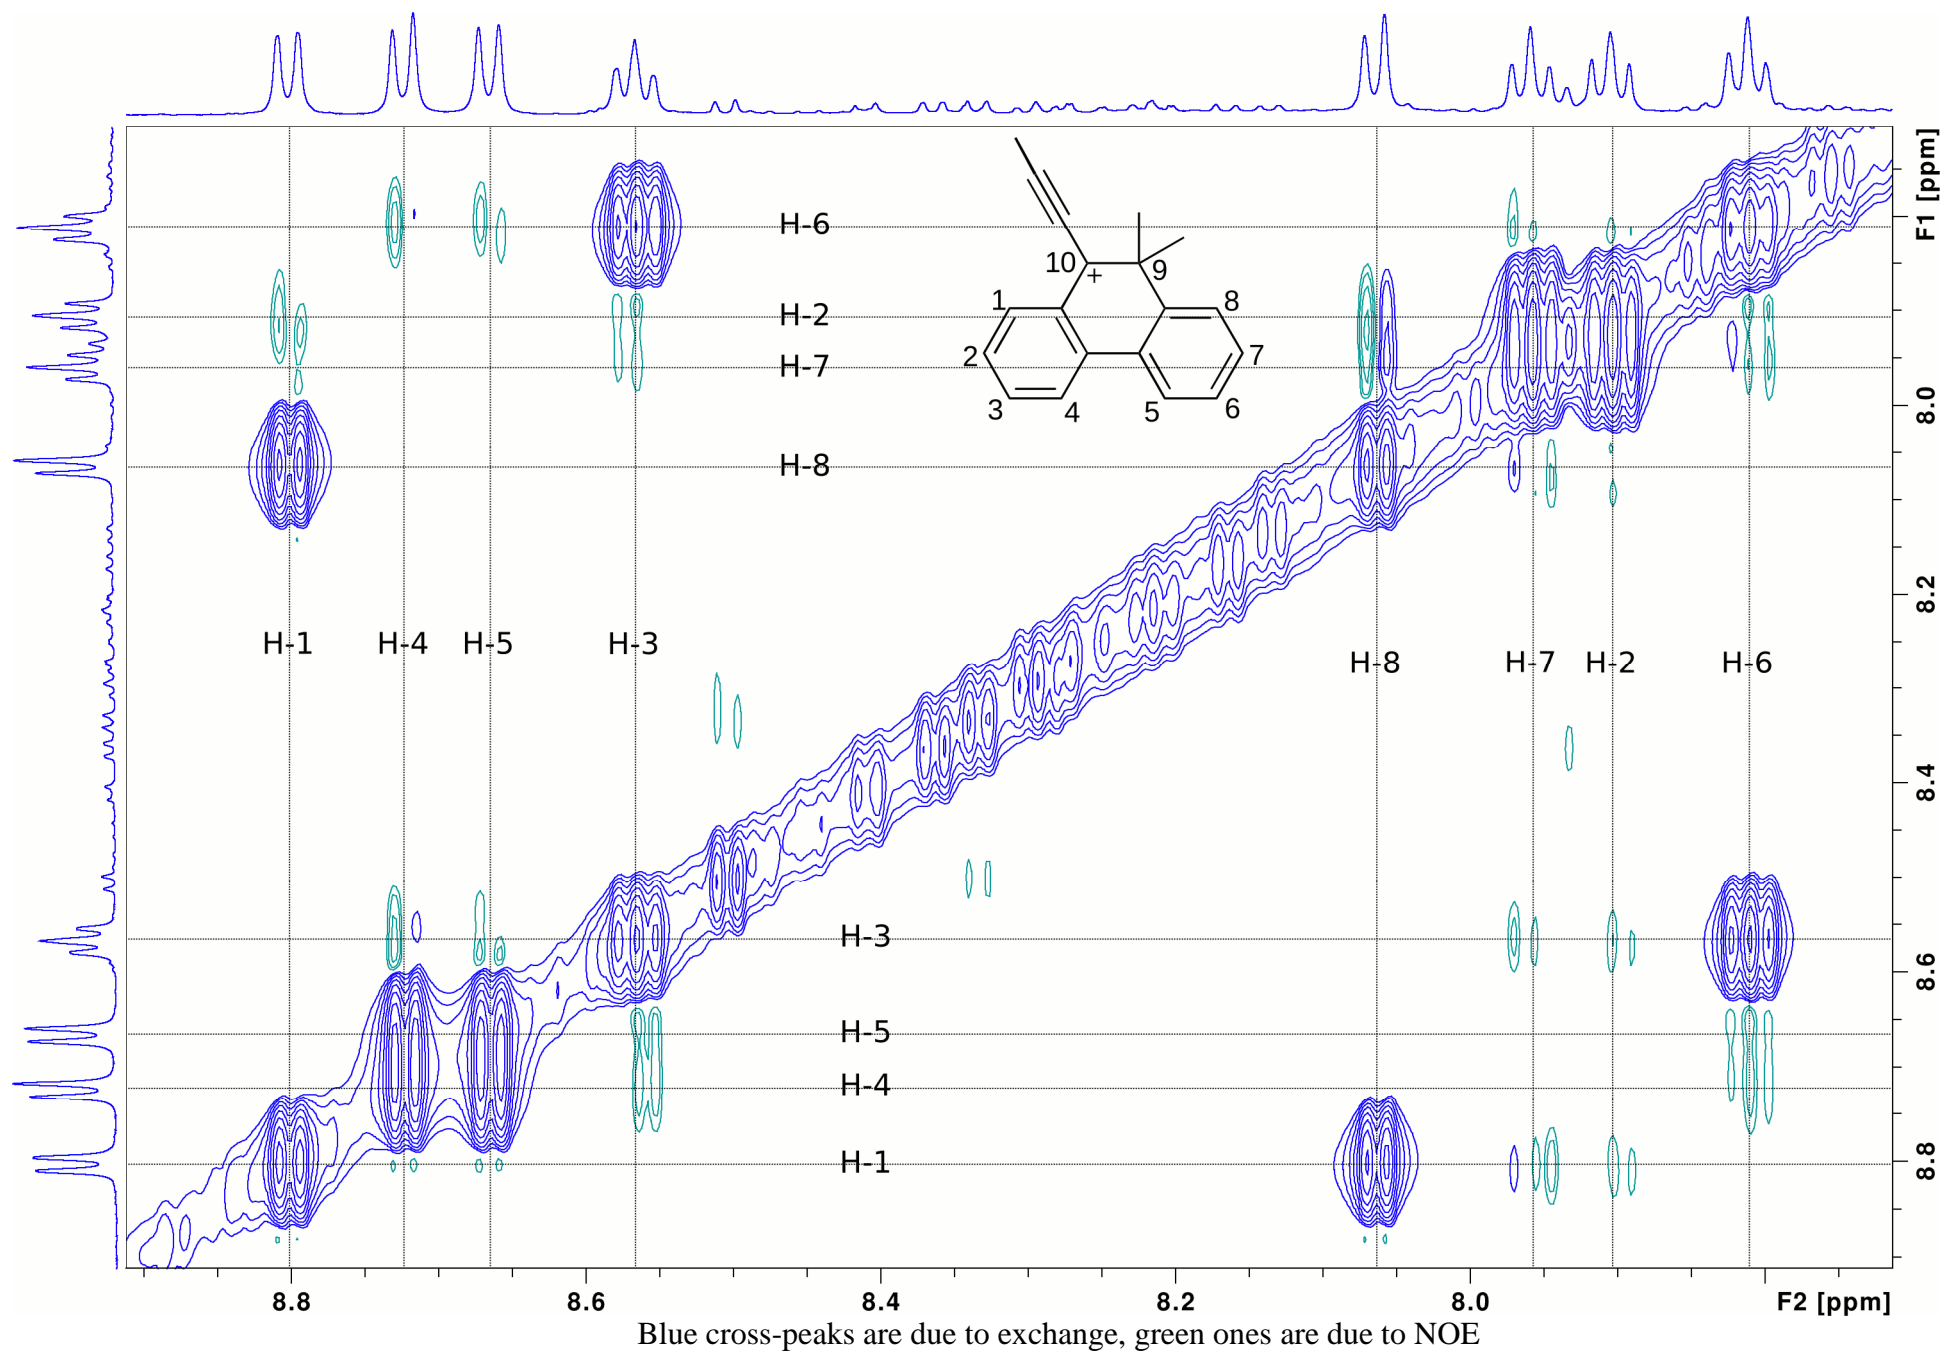



## Equilibrium constant of $1d \rightleftharpoons 2d$ ( $K = 2d/1d$ )

$y = ax+b$ , where

$a = \Delta H$ , kJ/mole;  $b = \Delta S$ , J deg.<sup>-1</sup> mole<sup>-1</sup>;  $y = R \cdot \ln(K)$ ;  $x = -1000/T$

| t, °C | T, K  | I <sub>1</sub> | I <sub>2</sub> | $K=I_1/(I_2-I_1)*2$ | $x=-1000/T$ | $y=R \ln K$ |
|-------|-------|----------------|----------------|---------------------|-------------|-------------|
| -50.0 | 223.1 | 3              | 7.02           | 1.493               | -4.482      | 3.329       |
| -50.2 | 223.0 | 3              | 6.98           | 1.508               | -4.484      | 3.413       |
| -50.2 | 223.0 | 3              | 6.97           | 1.511               | -4.484      | 3.433       |
| -39.3 | 233.8 | 3              | 7.18           | 1.435               | -4.276      | 3.005       |
| -28.2 | 245.0 | 3              | 7.33           | 1.386               | -4.082      | 2.712       |
| -16.8 | 256.3 | 3              | 7.53           | 1.325               | -3.901      | 2.336       |
| -5.2  | 268.0 | 3              | 7.75           | 1.263               | -3.731      | 1.942       |
| -22.5 | 250.6 | 3              | 7.49           | 1.336               | -3.990      | 2.410       |

I<sub>1</sub> – integral of **2d** 10-Me in <sup>1</sup>H NMR spectrum (see p. S2).

I<sub>2</sub> – integral of **2d** 9-Me and **1d** 9-Me in <sup>1</sup>H NMR spectrum (see p. S2).

R = 1.987\*4.184 J/(mole\*degree)

Parameters of the linear regression

|                  |        |
|------------------|--------|
| $\Delta H$ , kJ  | -1.893 |
| stdEr $\Delta H$ | 0.067  |
| $r^2$            | 0.9924 |

|                                                      |        |
|------------------------------------------------------|--------|
| $\Delta S$ , J deg. <sup>-1</sup> mole <sup>-1</sup> | -5.090 |
| stdEr $\Delta S$                                     | 0.28   |
| stdEr y                                              | 0.053  |

Extrapolation of equilibrium constant K to T = 177.6 K

| T, K  | $\Delta H$ , J | $\Delta S$ | $\Delta G = \Delta H - T \cdot \Delta S$ | $K = \exp(-\Delta G/R/T)$ |
|-------|----------------|------------|------------------------------------------|---------------------------|
| 177.6 | -1893          | -5.090     | -989                                     | <b>1.954</b>              |

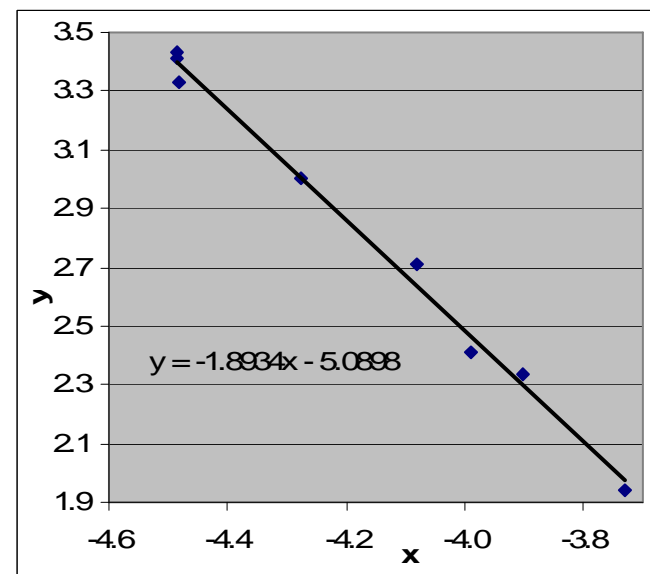

## Rate constant of the reaction **1d** → **2d** at 177.6 K

$y = ax + b$ , where

$a = k, s^{-1}$ ;  $y = -K/(K+1) * \ln((K-\gamma)/(1+\gamma))$ ;  $x = \text{time} - 1340850000$ ;  $\gamma = 2d/1d$

$K = 1.954$  (equilibrium constant at 177.6 K)

| time, s    | I <sub>1</sub> | I <sub>2</sub> | $\gamma = I_1/(I_2 - I_1) * 2$ | x    | y      |
|------------|----------------|----------------|--------------------------------|------|--------|
| 1340856326 | 3              | 15.36          | 0.485                          | 6326 | 0.0076 |
| 1340856693 | 3              | 12.48          | 0.633                          | 6693 | 0.1402 |
| 1340858042 | 3              | 8.36           | 1.119                          | 8042 | 0.6164 |

I<sub>1</sub> – integral of **2d** 10-Me in <sup>1</sup>H NMR spectrum (see p. S2).

I<sub>2</sub> – integral of **2d** 9-Me and **1d** 9-Me in <sup>1</sup>H NMR spectrum (see p. S2).

Parameters of the linear regression

|                    |           |                |          |
|--------------------|-----------|----------------|----------|
| k, s <sup>-1</sup> | 0.0003544 | r <sup>2</sup> | 0.999983 |
| stdEr k            | 0.0000015 | stdEr y        | 0.0019   |

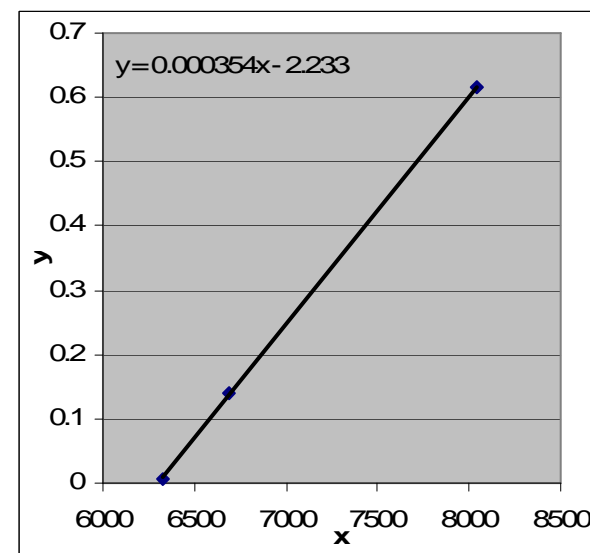

## Kinetics of the reaction **1d** → **2d**

The Eyring equation  $\Delta G^\ddagger = -RT(\ln(k/T) - 23.76)$ ;  $\Delta G^\ddagger = \Delta H^\ddagger - T\Delta S^\ddagger$

$y = ax + b$ , where

$a = \Delta H^\ddagger, \text{kJ}$ ;  $b = \Delta S^\ddagger, \text{J deg}^{-1} \text{mole}^{-1}$ ;  $y = R * (\ln(k/T) - 23.76)$ ;  $x = -1000/T$

$R = 1.987 * 4.184 \text{ J/(mole*degree)}$ ;  $k$  – rate constant, s<sup>-1</sup>

| t, °C | T, K  | k <b>1d</b> → <b>2d</b> | x      | y      | $\Delta G^\ddagger, \text{kJ}$ |
|-------|-------|-------------------------|--------|--------|--------------------------------|
| -95.5 | 177.6 | 0.000354                | -5.631 | -306.7 | 55.66                          |
| -22.5 | 250.6 | 7                       | -3.990 | -227.3 | 58.21                          |
| -16.8 | 256.3 | 12                      | -3.901 | -223.0 | 58.42                          |
| -5.2  | 268.0 | 36                      | -3.731 | -214.2 | 58.68                          |

Parameters of the linear regression

|                                |          |                                                         |        |
|--------------------------------|----------|---------------------------------------------------------|--------|
| $\Delta H^\ddagger, \text{kJ}$ | 48.52    | $\Delta S^\ddagger, \text{J deg}^{-1} \text{mole}^{-1}$ | -33.52 |
| stdEr $\Delta H^\ddagger$      | 0.20     | stdEr $\Delta S^\ddagger$                               | 0.86   |
| r <sup>2</sup>                 | 0.999967 | stdEr y                                                 | 0.301  |

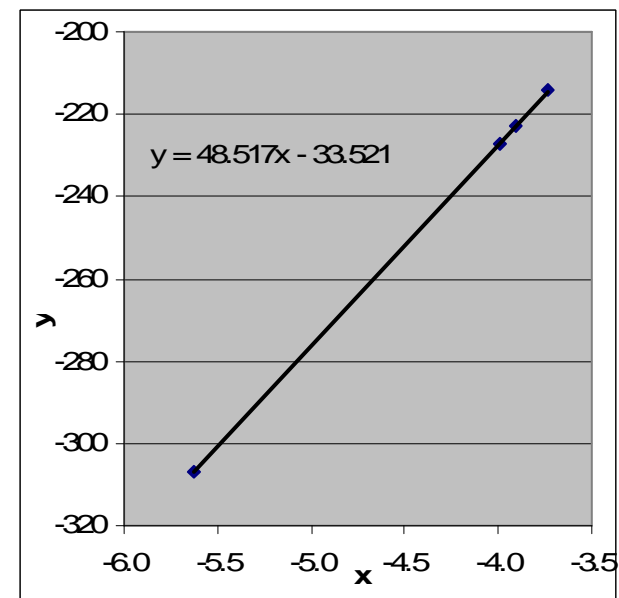

## Kinetics of the reaction **1b** → **1b'**

Eyring equation  $\Delta G^\ddagger = -RT(\ln(k/T)-23.76)$ ;  $\Delta G^\ddagger = \Delta H^\ddagger - T\Delta S^\ddagger$

$y = ax+b$ , where

$a = \Delta H^\ddagger$ , kJ;  $b = \Delta S^\ddagger$ , J deg.<sup>-1</sup> mole<sup>-1</sup>;  $y = R*(\ln(k/T)-23.76)$ ;  $x = -1000/T$

$R = 1.987*4.184$  J/(mole\*degree);  $k$  – rate constant, s<sup>-1</sup>

| T, °C | T, K  | k <b>1b</b> → <b>1b'</b> | x      | y      | $\Delta G^\ddagger$ , kJ |
|-------|-------|--------------------------|--------|--------|--------------------------|
| 48.3  | 321.4 | 7                        | -3.112 | -229.3 | 75.3                     |
| 61.5  | 334.7 | 20                       | -2.989 | -221.0 | 75.6                     |
| 74.7  | 347.9 | 50                       | -2.876 | -213.7 | 76.0                     |
| 48.3  | 321.4 | 9                        | -3.112 | -227.3 | 74.7                     |
| 61.4  | 334.5 | 24                       | -2.991 | -219.4 | 75.0                     |
| 27.9  | 301.1 | 1.59                     | -3.323 | -241.1 | 74.2                     |
| 10.5  | 283.7 | 0.32                     | -3.527 | -254.0 | 73.6                     |

Parameters of the linear regression

|                           |        |
|---------------------------|--------|
| $\Delta H^\ddagger$ , kJ  | 62.2   |
| stdEr $\Delta H^\ddagger$ | 1.6    |
| $r^2$                     | 0.9967 |

|                                                               |       |
|---------------------------------------------------------------|-------|
| $\Delta S^\ddagger$ , J deg. <sup>-1</sup> mole <sup>-1</sup> | -34.4 |
| stdEr $\Delta S^\ddagger$                                     | 5.0   |
| stdEr y                                                       | 0.87  |

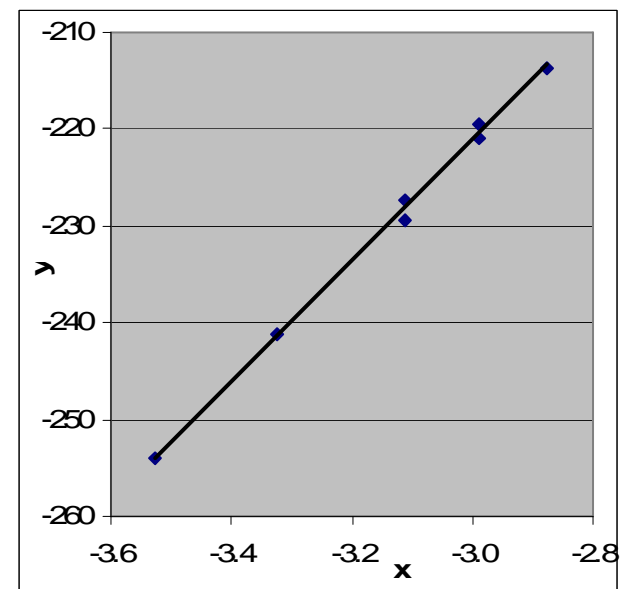

Quantum chemical calculations (basis  $\Lambda 1$  (cc-pVDZ), PRIRODA program)

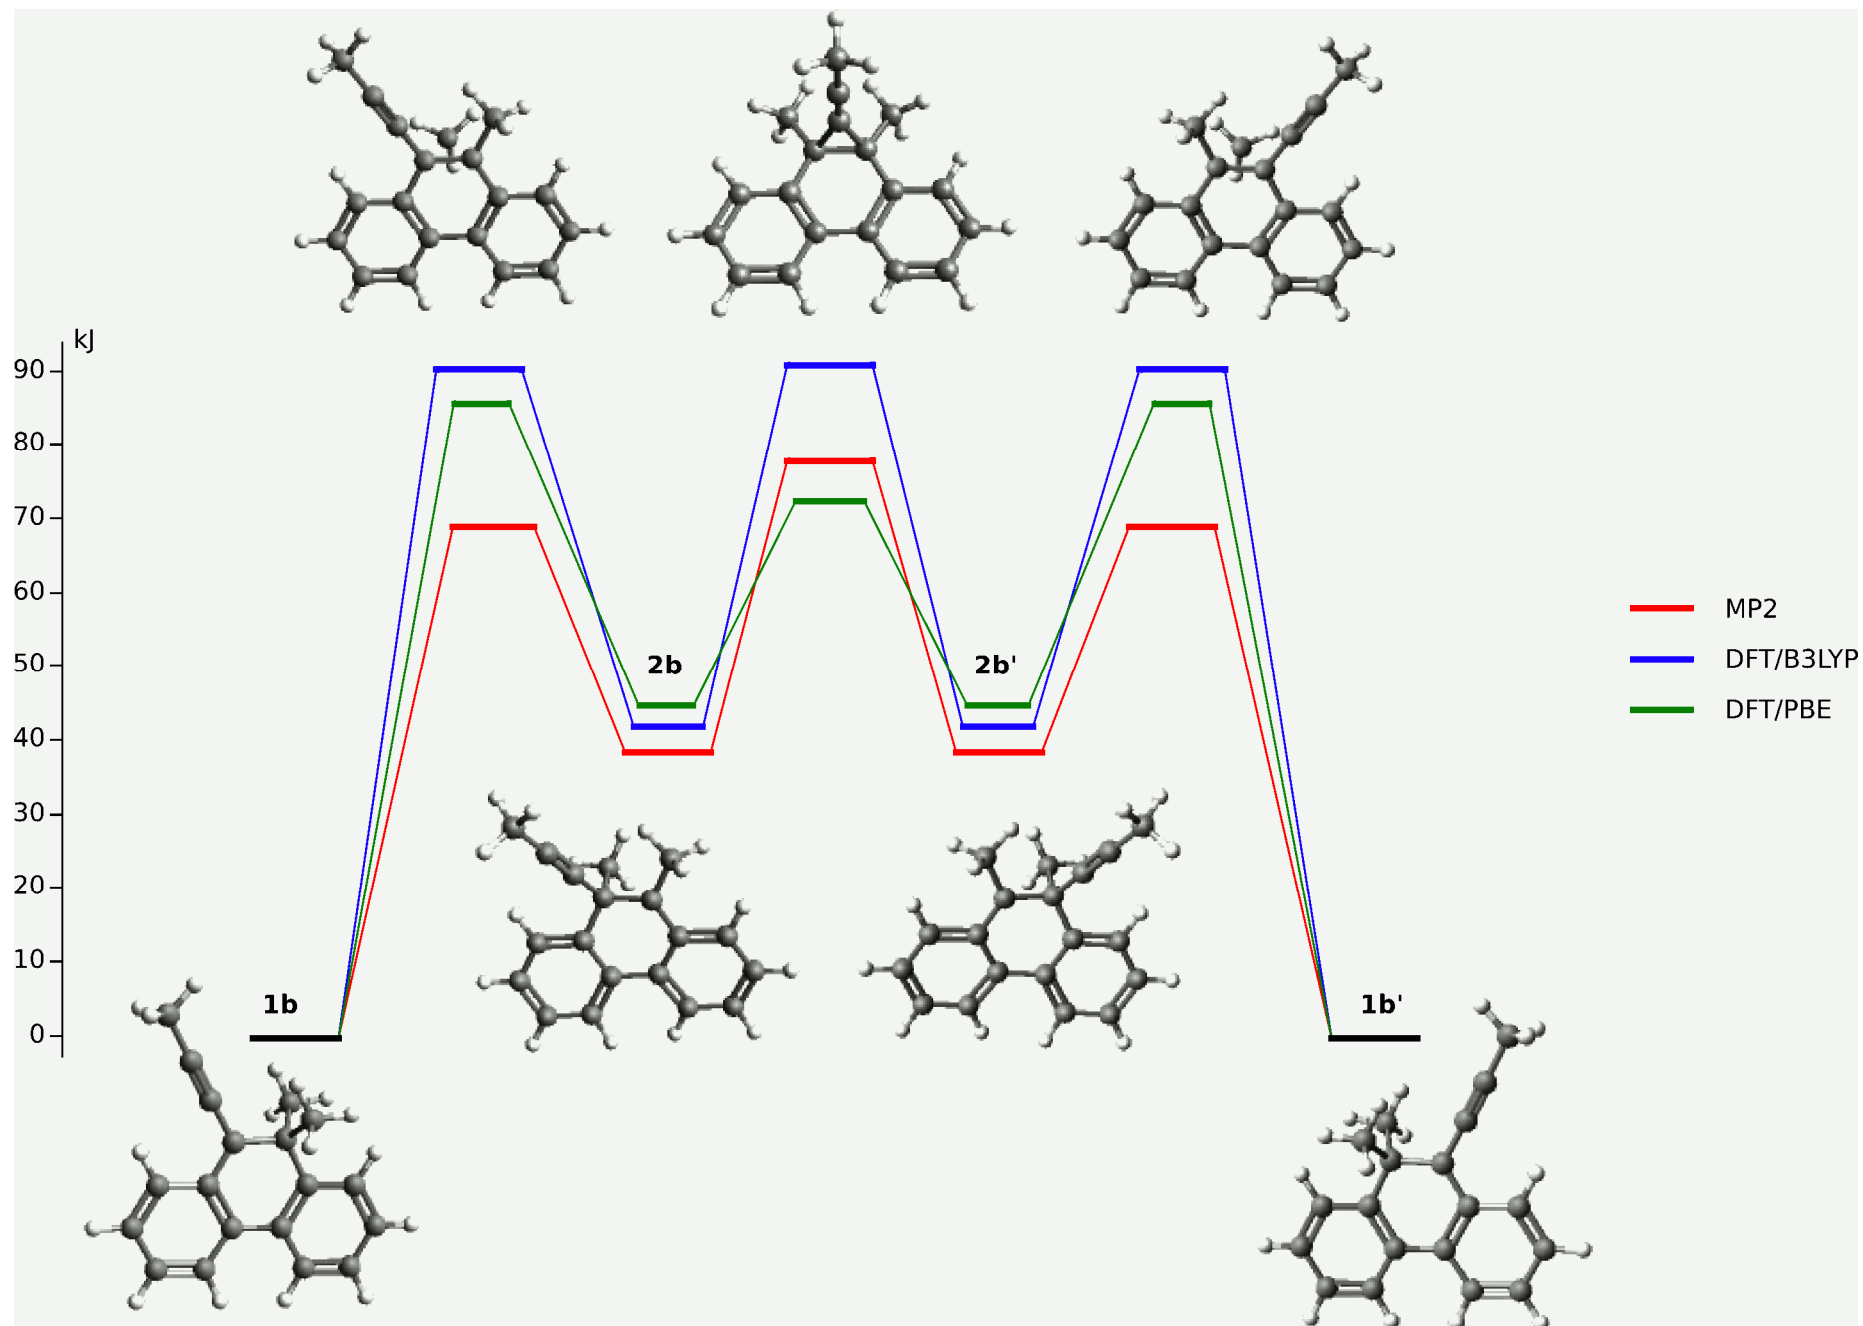

Optimized coordinates of cation **1b** by RI-MP2/Å1

36  
Energy -731.85703833  
C 1.03529781 -1.50218756 0.01436759  
C 1.91976671 -0.35443345 0.00132741  
C 1.37449781 0.94771858 -0.01138719  
C -0.10941955 1.19743949 -0.01206712  
C -0.94117935 -0.04084083 0.00113101  
C -0.39103268 -1.33105976 0.01396329  
C 3.32270117 -0.51018587 0.00106512  
C 4.15895654 0.58721119 -0.01125726  
C 3.61728976 1.87513878 -0.02367666  
C 2.24263500 2.04460898 -0.02365524  
C -1.25835416 -2.46353347 0.02665149  
C -0.74189476 -3.73059681 0.03949641  
C 0.65573794 -3.90493206 0.04008702  
C 1.51444416 -2.82300170 0.02789553  
C -0.49984166 2.02004984 1.24982451  
C -0.50298935 1.99556581 -1.28854811  
C -2.32980158 0.13204956 0.00054544  
C -3.53808545 0.32965425 -0.00050834  
C -4.97107107 0.55020889 -0.00138986  
H 3.76865559 -1.49638697 0.01049267  
H 5.23437084 0.44684804 -0.01126870  
H 4.26916058 2.74238883 -0.03337471  
H 1.84398195 3.05289961 -0.03344656  
H -2.32935768 -2.29601112 0.02596507  
H -1.39785889 -4.59385040 0.04921177  
H 1.06989164 -4.90879024 0.05034687  
H 2.57844991 -3.01714674 0.02905841  
H -1.57089250 2.23217450 1.24460718  
H -0.24269759 1.47122250 2.15947779  
H 0.04594954 2.96501271 1.24633706  
H -1.57406616 2.20756602 -1.28487424  
H 0.04253429 2.94054475 -1.30460994  
H -0.24791344 1.42937299 -2.18808276  
H -5.42077337 0.11461426 0.89636655  
H -5.20041390 1.61831111 -0.02582251  
H -5.42667806 0.07235632 -0.87424900

Optimized coordinates of cation **2b** by RI-MP2/Å1

36  
Energy -731.84237326  
C -2.01205654 1.75199969 -0.16886023  
C -0.87934608 0.92991098 -0.05422888  
C 0.39875373 1.58497028 0.06837211  
C 0.46501685 3.01035411 0.14214837  
C -0.67271049 3.76703450 0.05749401  
C -1.91528557 3.12877559 -0.11577526  
C -0.97992097 -0.51418307 -0.02533336  
C 0.19619645 -1.28788805 0.00119546  
C 1.54460888 -0.63240371 -0.12383956  
C 1.57413729 0.83429342 0.10979604  
C -2.22589362 -1.17543025 0.02009900  
C -2.29153594 -2.55382971 0.07170348  
C -1.11706753 -3.31246263 0.08579628  
C 0.11544906 -2.67959264 0.04964641  
C 2.57303152 -1.32991550 0.63851462  
C 3.42888706 -1.93734369 1.25392236  
C 1.91514272 -0.69981631 -1.67515188  
C 2.91285759 1.46874196 0.27462162  
C 4.44596845 -2.66461393 2.00278841  
H -0.61910289 4.84861196 0.10921624  
H -2.81686797 3.72736292 -0.20588358  
H -2.99108171 1.31151478 -0.30280600  
H 1.42533584 3.49636863 0.25754066  
H -3.15084401 -0.61263312 0.03258342  
H -3.25743206 -3.04557585 0.11063214  
H -1.16847471 -4.39507041 0.13710675  
H 1.02967661 -3.26296686 0.08138399  
H 2.88387981 -0.23283406 -1.86123734  
H 1.96670243 -1.75988855 -1.93121879  
H 1.13364853 -0.21348044 -2.26420382  
H 3.71094507 0.73865537 0.15074596  
H 3.05670889 2.29786398 -0.42299908  
H 2.98891971 1.87307601 1.29228466  
H 5.08402822 -1.97367764 2.56007417  
H 3.98128832 -3.34867456 2.71764809  
H 5.07980207 -3.24844713 1.33053856

Optimized coordinates of TS **1b** → **2b** by RI-MP2/Λ1

36  
Energy -731.83066803  
C -0.74037083 1.27905607 0.05725436  
C 0.71625954 1.29070859 0.05989948  
C 1.46276619 2.48161797 -0.00602868  
C 2.84532691 2.46267587 0.00879617  
C 3.53941957 1.25077041 0.09265714  
C 2.83576268 0.06418816 0.15872578  
C 1.43276533 0.07282054 0.14388157  
C -1.44839251 0.04704459 0.12634854  
C -2.85741608 0.04414078 0.14243904  
C -3.56413615 1.22833024 0.08977174  
C -2.87555246 2.44325334 0.01412510  
C -1.49323565 2.46461714 -0.00052428  
C -0.72658858 -1.20085449 0.21061513  
C 0.70311893 -1.19000063 0.20242688  
C 1.41476541 -2.36298400 0.59150645  
C -1.44497265 -2.47231527 0.55609482  
C 0.09420196 -1.45049896 -1.57751651  
H 0.96219356 3.43931684 -0.06965430  
H 3.39289931 3.39793732 -0.04309894  
H 4.62393095 1.24217386 0.10765265  
H 3.35837152 -0.88299293 0.23134916  
H -3.40048568 -0.88996196 0.20741060  
H -4.64845226 1.21438180 0.10709181  
H -3.42611991 3.37724128 -0.02970258  
H -0.99479639 3.42395148 -0.05337668  
C 2.04357634 -3.34733159 0.93918336  
H -0.78004975 -3.33174562 0.47594560  
H -1.78389377 -2.39491764 1.59501593  
H -2.31937223 -2.63392079 -0.07621223  
H 1.04592908 -1.92435111 -1.81876241  
H -0.73201765 -2.12545677 -1.80056051  
H -0.01634415 -0.45168998 -1.99181854  
C 2.79176183 -4.51872987 1.36879253  
H 2.11954518 -5.27969782 1.77331272  
H 3.34115474 -4.95321947 0.52925375  
H 3.51103965 -4.24581941 2.14559234

Optimized coordinates of TS **2b** → **2b'** by RI-MP2/Λ1

36  
Energy -731.82728662  
C -1.92422871 1.71603690 0.52072075  
C -0.82456675 0.90706048 0.18264479  
C 0.44503461 1.52630854 0.07711593  
C 0.57411806 2.90705028 0.31025659  
C -0.52625487 3.67461848 0.63801800  
C -1.78233105 3.07206322 0.74608802  
C -0.97272696 -0.52172649 -0.06745813  
C 0.15100896 -1.30910790 -0.41923238  
C 1.48004601 -0.69825939 -0.53924556  
C 1.62916210 0.73968712 -0.28752420  
C -2.22256758 -1.16105182 0.01712459  
C -2.36151349 -2.51329491 -0.23160489  
C -1.24761565 -3.28175879 -0.57970632  
C -0.00567957 -2.68416492 -0.66850030  
C 2.03682576 -0.26438003 0.92970388  
C 2.51804385 -0.50682351 2.02963005  
C 2.54326582 -1.47105836 -1.28997068  
C 2.85048651 1.49169127 -0.77136755  
C 3.04379309 -0.79174920 3.34585745  
H -0.41206830 4.73944028 0.80965591  
H -2.65158763 3.66723000 1.00532177  
H -2.91191909 1.28371661 0.61081943  
H 1.53806795 3.39053360 0.22684941  
H -3.10689612 -0.59670073 0.28174078  
H -3.34038097 -2.97518570 -0.15738800  
H -1.35383499 -4.34236608 -0.78013896  
H 0.84498371 -3.29314179 -0.94314852  
H 3.51129427 -0.97985901 -1.27294784  
H 2.67248108 -2.46360730 -0.86039901  
H 2.21556050 -1.57403067 -2.32919416  
H 3.70011962 0.84104254 -0.95419436  
H 2.58627361 2.00106387 -1.70341395  
H 3.15971610 2.23521930 -0.03793438  
H 4.13066602 -0.89982024 3.31776946  
H 2.78187884 0.01802055 4.03543876  
H 2.60155519 -1.71650221 3.73199563
